# Supplementary material for: Irreversible phase transition in BiVO4nanostructures synthesized by a polyol method and enhancement in photo degradation of methylene blue
Source: Royal Society of Chemistry journal article supplement (doi:10.1039/c6ra14700c), 2016-01-01
Supplement: c6ra14700c1.pdf [file c6ra14700c1.pdf]

## Irreversible Phase Transition in BiVO<sub>4</sub> Nanostructures Synthesized by Polyol Method and Enhancement in Photo Degradation of Methylene Blue

Swati Nikam<sup>a</sup> and Satyawati Joshi<sup>\*a</sup>

Department of Chemistry, Center for Advanced Studies in Chemistry, Savitribai Phule Pune University, Pune 411007, India.

### Supplementary Information

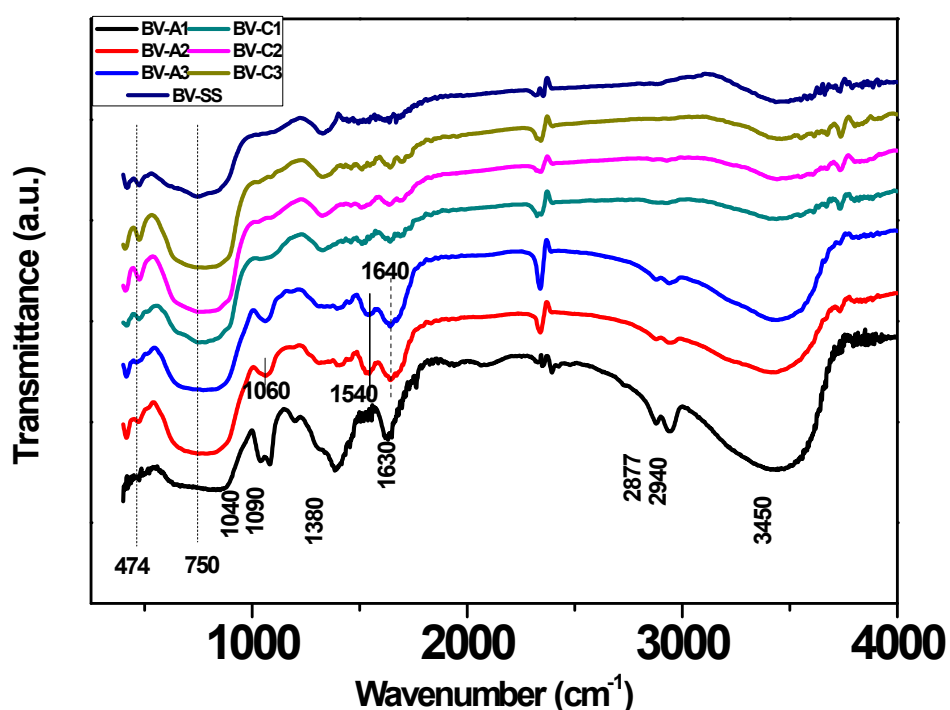

Figure S1: FTIR spectra of BiVO<sub>4</sub> synthesized by polyol method

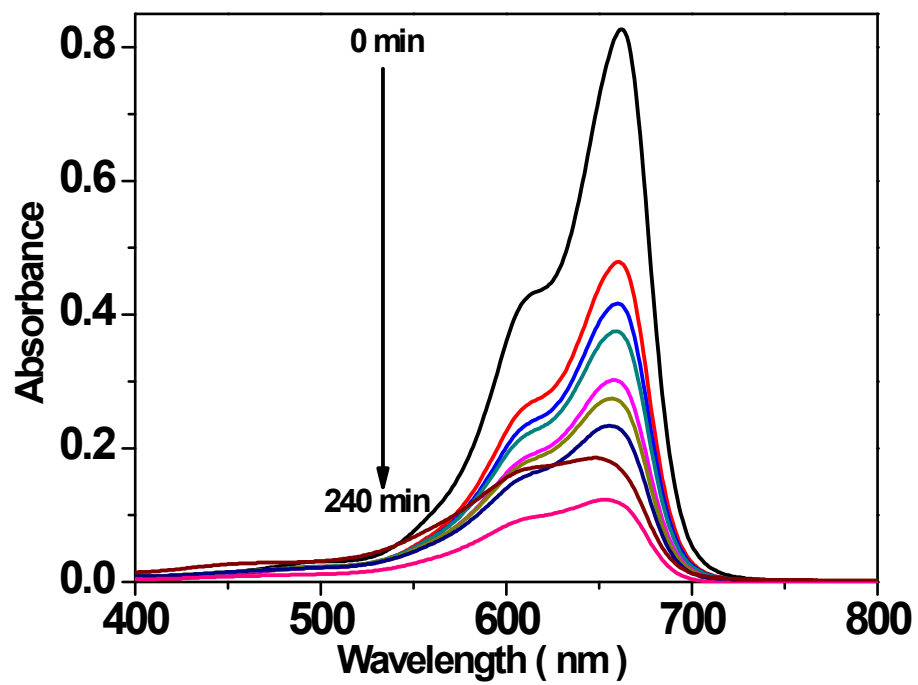

**Figure S2:** Time dependent UV-Visible absorption spectra of Methylene Blue in presence of BiVO<sub>4</sub> (sample BV-A2)
